# Supplementary material for: Novel disease-causing variant in RDH12 presenting with autosomal dominant retinitis pigmentosa
Source: PubMed Central journal article supplement (PMC9411907; doi:10.1136/bjophthalmol-2020-318034), 2021-05-24
Supplement: bjophthalmol-2020-318034supp001.pdf [file bjophthalmol-2020-318034supp001.pdf]

Supplemental File 1. Foveal Total Retinal Thickness and Outer Nuclear Layer Thickness for five family members.

| Individual<br>Family member | Age<br>(years) | Foveal TRT ( $\mu\text{m}$ ) |        | Foveal ONLT ( $\mu\text{m}$ ) |        |
|-----------------------------|----------------|------------------------------|--------|-------------------------------|--------|
|                             |                | OD                           | OS     | OD                            | OS     |
| IV-3 (affected)             | 15             | 241                          | 240    | 114                           | 121    |
| IV-4 (unaffected)           | 15             | 254                          | 255    | 118                           | 126    |
| % diff for IV-3             |                | -5.3%                        | -6.1%  | -3.4%                         | -4.0%  |
| III-2 (affected)            | 40             | 219                          | 215    | 98                            | 99     |
| III-12 (affected)           | 40             | 232                          | 240    | 97                            | 102    |
| III-11 (unaffected)         | 44             | 251                          | 254    | 114                           | 121    |
| % diff for III-2            |                | -13.6%                       | -16.6% | -15.1%                        | -20.0% |
| % diff for III-12           |                | -7.9%                        | -5.7%  | -16.1%                        | -17.0% |

The percentage difference (% diff) was calculated as  $100 \times (\text{difference}/\text{mean})$ . The affected individuals always have thinner foveal thickness (indicated by the minus sign) than their age-matched unaffected family members.

TRT – Total Retinal Thickness; ONLT – Outer Nuclear Layer Thickness; OD – oculus dextra; OS – oculus sinistra.
