# Supplementary material for: Novel disease-causing variant in RDH12 presenting with autosomal dominant retinitis pigmentosa
Source: PubMed Central journal article supplement (PMC9411907; doi:10.1136/bjophthalmol-2020-318034), 2021-05-24
Supplement: bjophthalmol-2020-318034supp002.pdf [file bjophthalmol-2020-318034supp002.pdf]

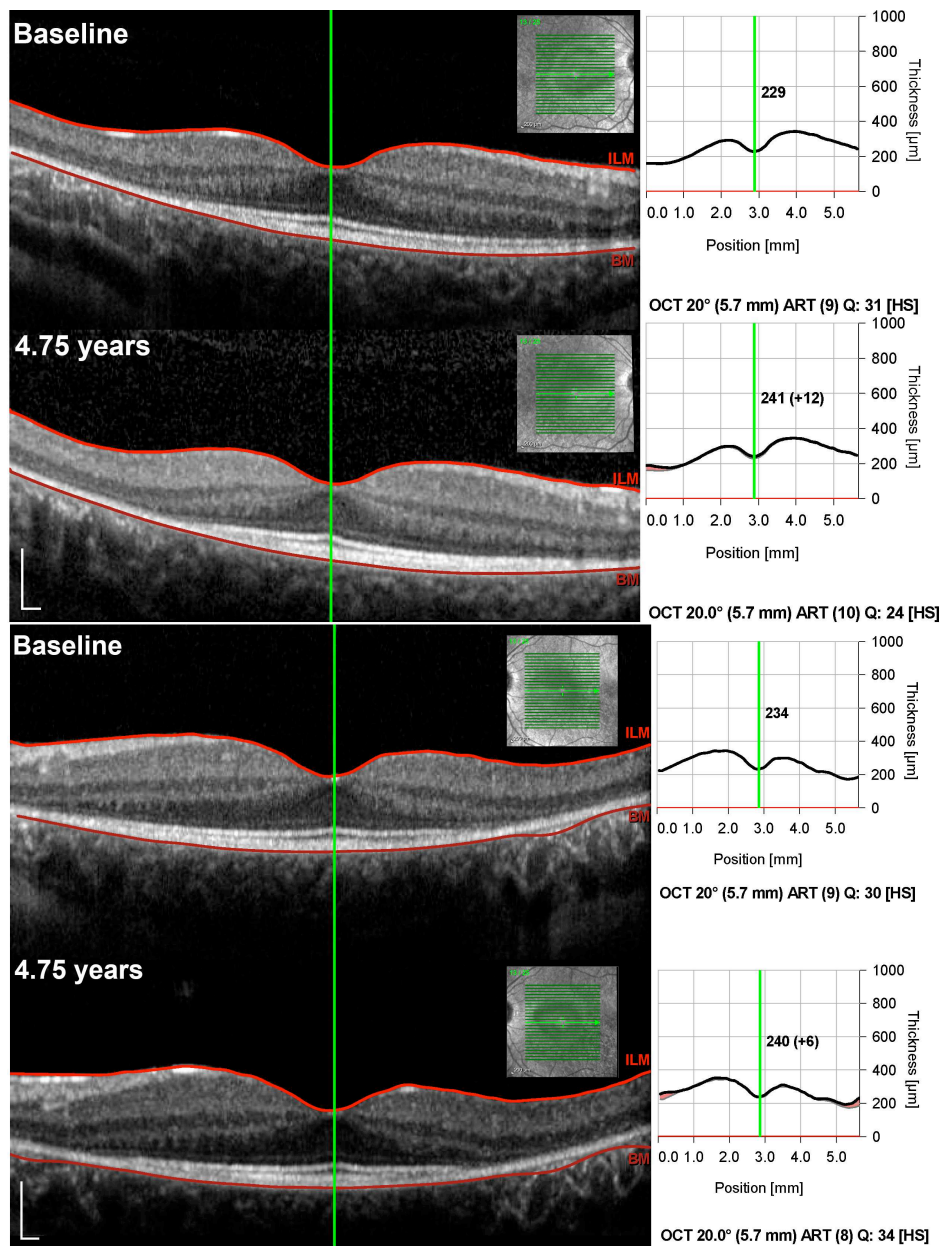

Supplemental File 2. Affected family member IV-3 (10 years old at baseline). Longitudinal analysis (4.75 years) of foveal Total Retinal Thickness (TRT) in both eyes. OCT scans obtained in follow-up mode and registered to the baseline visit. Small retinal thickness increase for right (12 $\mu$ m) and left eye (6 $\mu$ m). ILM; Internal Limiting Membrane, BM; Bruch's Membrane. Scale bars, 200  $\mu$ m.
