# Supplementary material for: Novel disease-causing variant in RDH12 presenting with autosomal dominant retinitis pigmentosa
Source: HighWire-hosted journal article supplement (doi:10.1136/bjophthalmol-2020-318034), 2021-05-24
Supplement: bjophthalmol-2020-318034supp003_data_supplement.pdf [file bjophthalmol-2020-318034supp003_data_supplement.pdf]

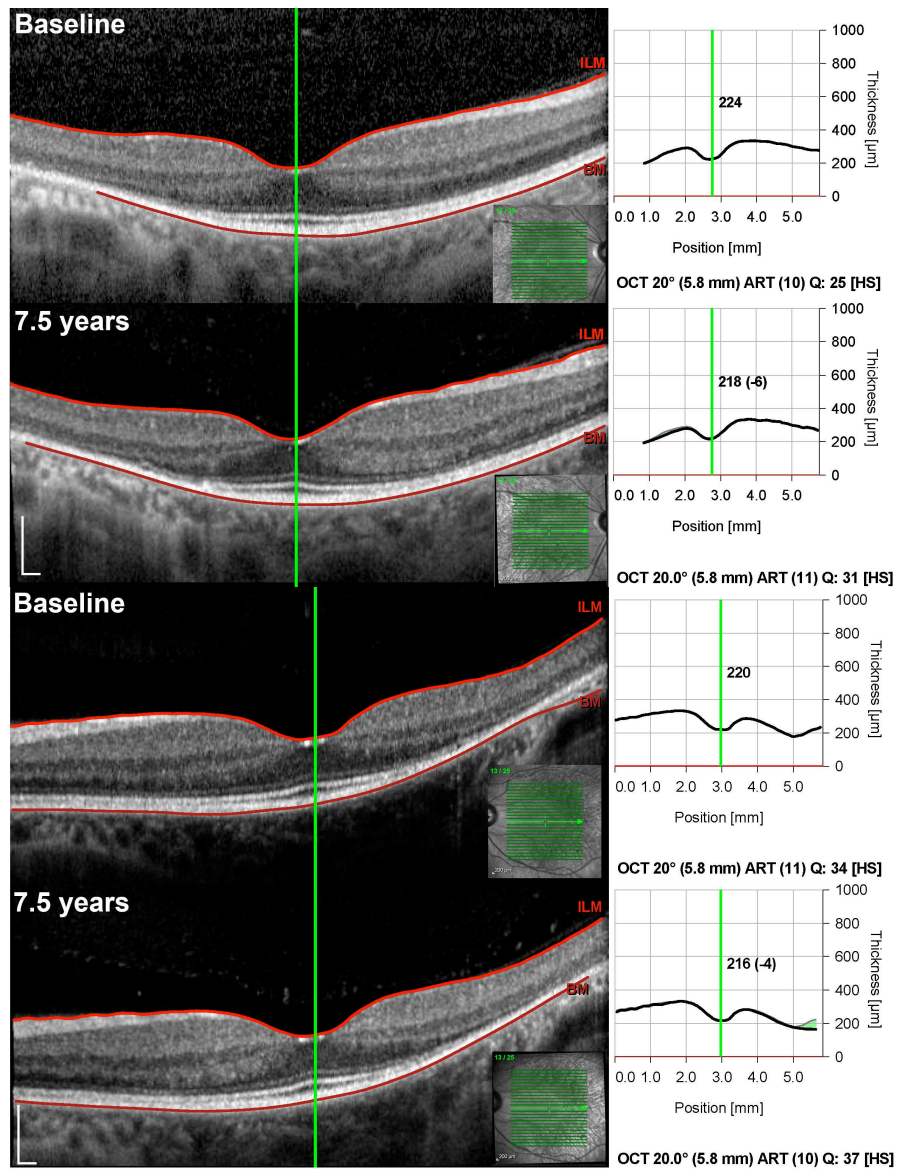

Supplemental File 3. Affected family member III-2 (36 years old at baseline). Longitudinal analysis (7.5 years) of foveal Total Retinal Thickness (TRT) in both eyes. OCT scans obtained in follow-up mode and registered to the baseline visit. Small retinal thickness loss for right (6µm) and left eye (4µm). ILM; Internal Limiting Membrane, BM; Bruch's Membrane. Scale bars, 200 µm.
