# Supplementary material for: Novel disease-causing variant in RDH12 presenting with autosomal dominant retinitis pigmentosa
Source: PubMed Central journal article supplement (PMC9411907; doi:10.1136/bjophthalmol-2020-318034), 2021-05-24
Supplement: bjophthalmol-2020-318034supp004.pdf [file bjophthalmol-2020-318034supp004.pdf]

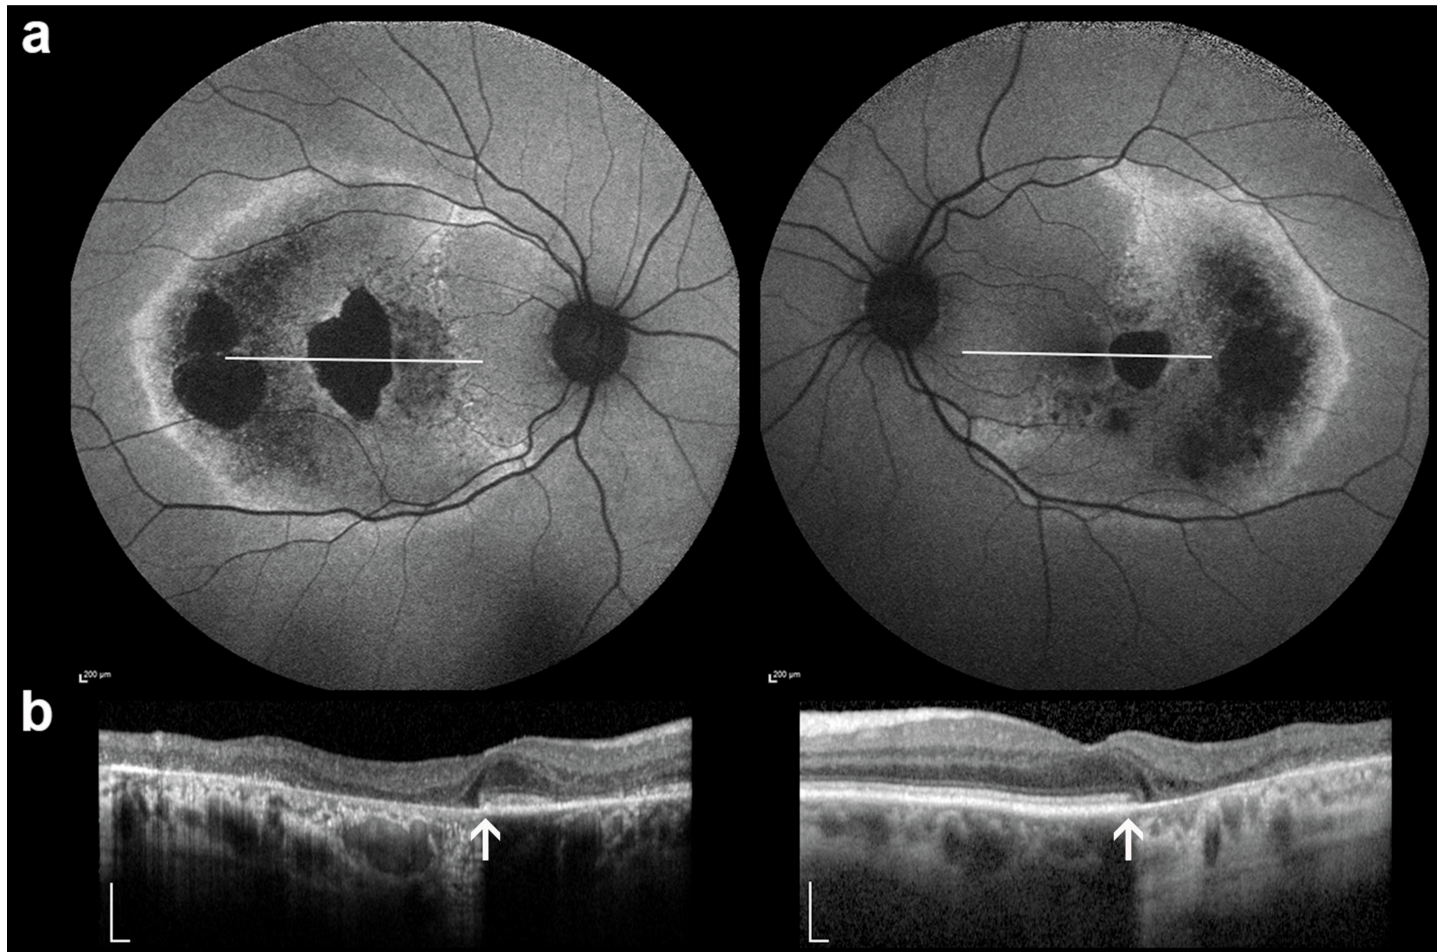

Supplemental File 4. Fundus autofluorescence of individual II-7 a) shows extensive parafoveal and temporal macula hypo-autofluorescence bilaterally b) The corresponding OCT scans taken at the white lines in 4a, show the point at which the outer retina has been lost temporal to the fovea (arrows).
