# Supplementary material for: Novel disease-causing variant in RDH12 presenting with autosomal dominant retinitis pigmentosa
Source: HighWire-hosted journal article supplement (doi:10.1136/bjophthalmol-2020-318034), 2021-05-24
Supplement: bjophthalmol-2020-318034supp005_data_supplement.pdf [file bjophthalmol-2020-318034supp005_data_supplement.pdf]

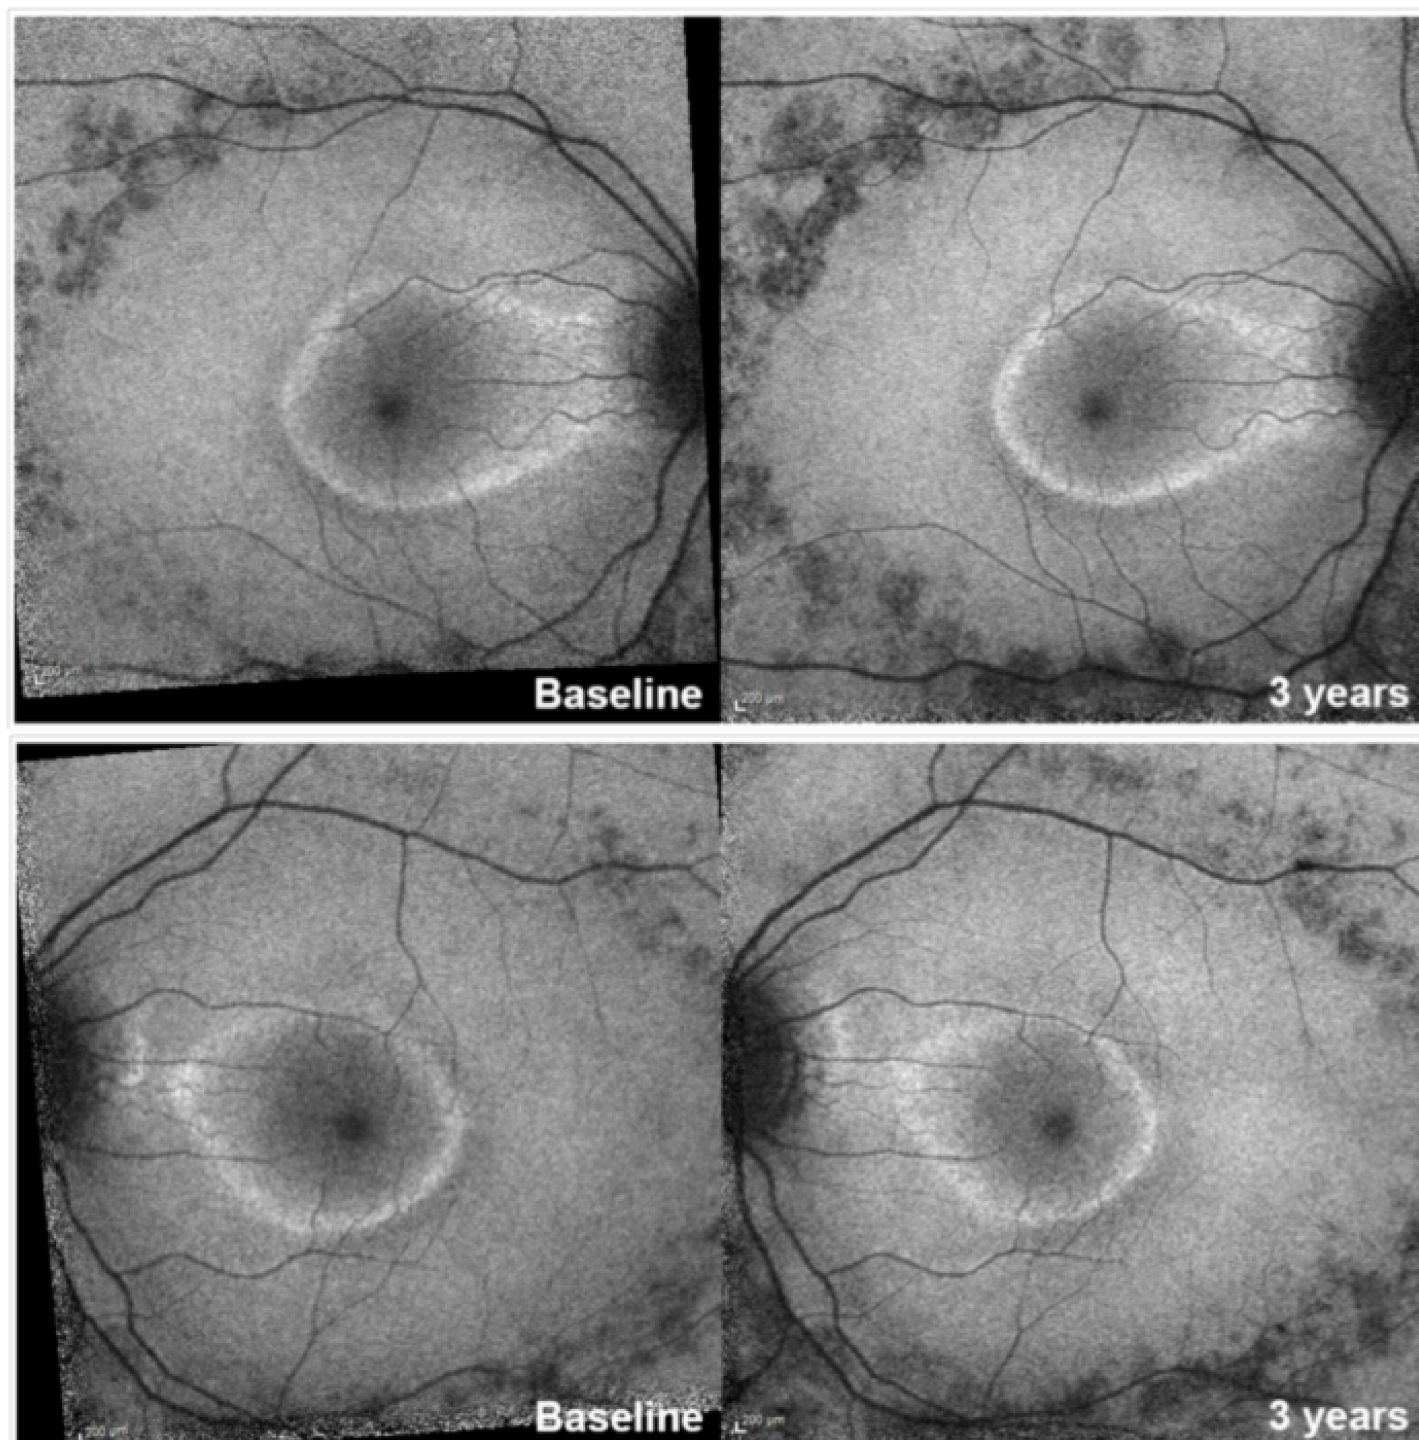

**Supplemental File 5. Fundus autofluorescence (FAF) of proband IV-3 (12 years old at baseline). Longitudinal progression (3 years) of short-wavelength FAF 35 degrees wide for the right (top row) and left eye (bottom row). Baseline images have been spatially registered to the follow-up visit. A gradual constriction of the parafoveal hyperautofluorescent rings and an increase in the area of hypoautofluorescence along the temporal arcades and at the temporal macula in both eyes at 3 years compared to baseline.**
