# Supplementary material for: Novel disease-causing variant in RDH12 presenting with autosomal dominant retinitis pigmentosa
Source: PubMed Central journal article supplement (PMC9411907; doi:10.1136/bjophthalmol-2020-318034), 2021-05-24
Supplement: bjophthalmol-2020-318034supp006.pdf [file bjophthalmol-2020-318034supp006.pdf]

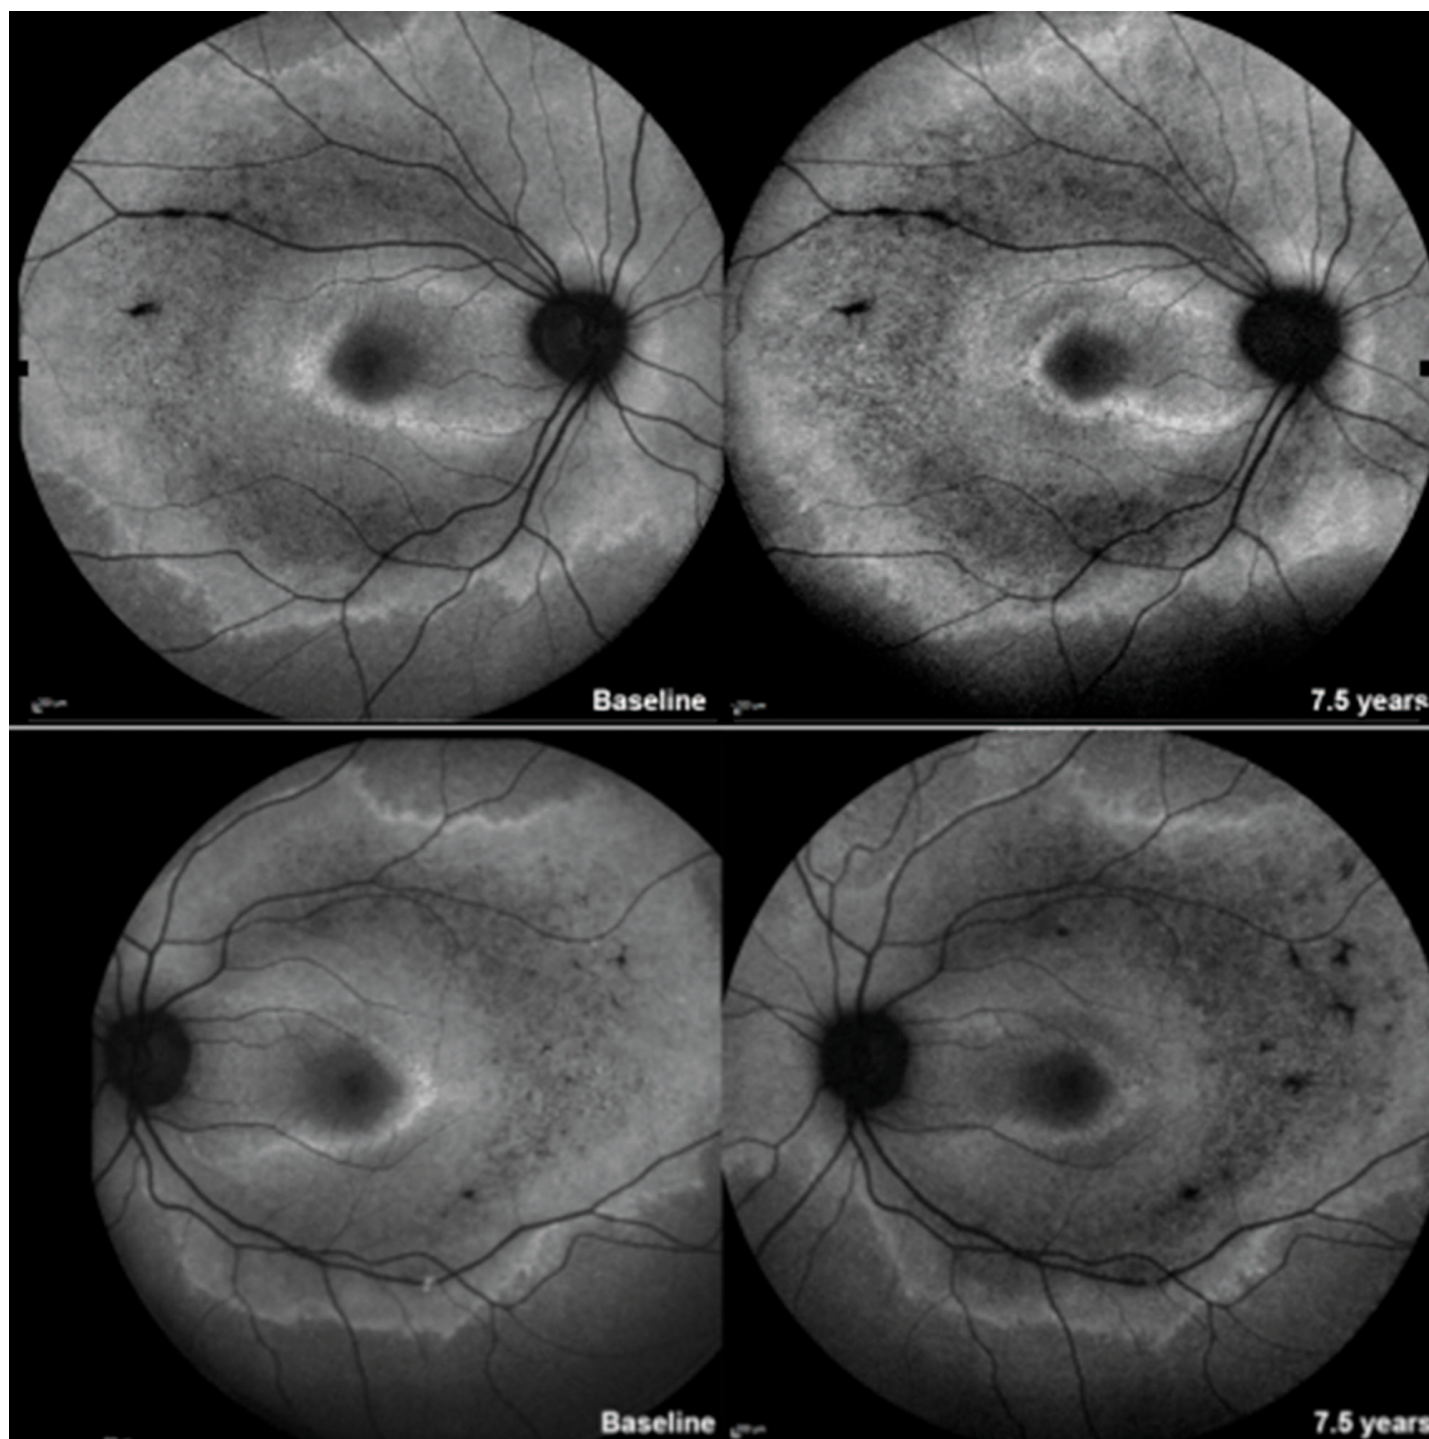

Supplemental File 6. Fundus autofluorescence (FAF) of affected family member III-2 (36 years old at baseline). Longitudinal progression (7.5 years) of short-wavelength FAF, 55 degrees wide, for the right (top row) and left eye (bottom row). Baseline images have been spatially registered to the follow-up visit. Gradual constriction of the parafoveal hyper-autofluorescent rings and an increase in the area of perifoveal hypo-autofluorescence at the temporal macula in both eyes at 7.5 years compared to baseline.
