# Supplementary material for: Novel disease-causing variant in RDH12 presenting with autosomal dominant retinitis pigmentosa
Source: PubMed Central journal article supplement (PMC9411907; doi:10.1136/bjophthalmol-2020-318034), 2021-05-24
Supplement: bjophthalmol-2020-318034supp007.pdf [file bjophthalmol-2020-318034supp007.pdf]

Supplemental File 7. Cone densities along the temporal meridian in proband (IV-3), minimally symptomatic mother (III-12) and unaffected father (III-11) compared to the relevant reported normative values from Cooper et al. 2016.<sup>27</sup>

| Eccentricity from foveal centre     | 0.5T            | 1T             | 2T             | 3T             | 4T             | 5T             |
|-------------------------------------|-----------------|----------------|----------------|----------------|----------------|----------------|
| Eccentricity bin from Cooper et al. | 150 $\mu$ m     | 300 $\mu$ m    | 600 $\mu$ m    | 1000 $\mu$ m   | 1200 $\mu$ m   | 1600 $\mu$ m   |
| IV-3                                | 71.6 $\pm$ 5.8  | 41.8 $\pm$ 1.0 | 20.7 $\pm$ 1.1 | 14.5 $\pm$ 0.5 | 11.4 $\pm$ 1.6 | 10.7 $\pm$ 0.7 |
| III-12                              | na              | 52.6 $\pm$ 2.2 | 28.8 $\pm$ 2.3 | 18.3 $\pm$ 0.7 | 14.8 $\pm$ 0.7 | 11.5 $\pm$ 0.8 |
| III-11                              | 78.5 $\pm$ 0.7  | 53.8 $\pm$ 1.1 | 32.2 $\pm$ 1.0 | 21.8 $\pm$ 1.1 | 16.6 $\pm$ 0.3 | 13.8 $\pm$ 0.5 |
| Cooper et al.                       | 90.7 $\pm$ 13.0 | 61.8 $\pm$ 8.4 | 39.0 $\pm$ 5.7 | 24.6 $\pm$ 5.0 | 18.6 $\pm$ 2.2 | 14.4 $\pm$ 1.7 |

Units are  $\times 10^3$  cones/mm<sup>2</sup>  $\pm$  standard deviation.

T – degrees temporal; na – not available.
